# Supplementary material for: Halogen bonding or close packing? Examining the structural landscape in a series of Cu(ii)-acac complexes
Source: Royal Society of Chemistry journal article supplement (doi:10.1039/c1dt10911a), 2011-01-01

# **Halogen bonding or close packing? Examining the structural landscape in a series of Cu(II)-acac complexes**

Christer B. Aakeröy,\* Abhijeet S. Sinha, Prashant D. Chopade and John Desper

Department of Chemistry, Kansas State University, Manhattan, KS 66503

[aakeroy@ksu.edu](mailto:aakeroy@ksu.edu)

## **Supporting Information**

## Table of contents

|                                                                            |    |
|----------------------------------------------------------------------------|----|
| General experimental details.....                                          | S3 |
| Molecular electrostatic potential charge calculations for <b>3-5</b> ..... | S3 |
| <sup>1</sup> H and <sup>13</sup> C NMR spectra of <b>2</b> .....           | S4 |
| <sup>1</sup> H and <sup>13</sup> C NMR spectra of <b>3</b> .....           | S5 |
| <sup>1</sup> H and <sup>13</sup> C NMR spectra of <b>4</b> .....           | S6 |
| <sup>1</sup> H and <sup>13</sup> C NMR spectra of <b>5</b> .....           | S7 |



### NMR data

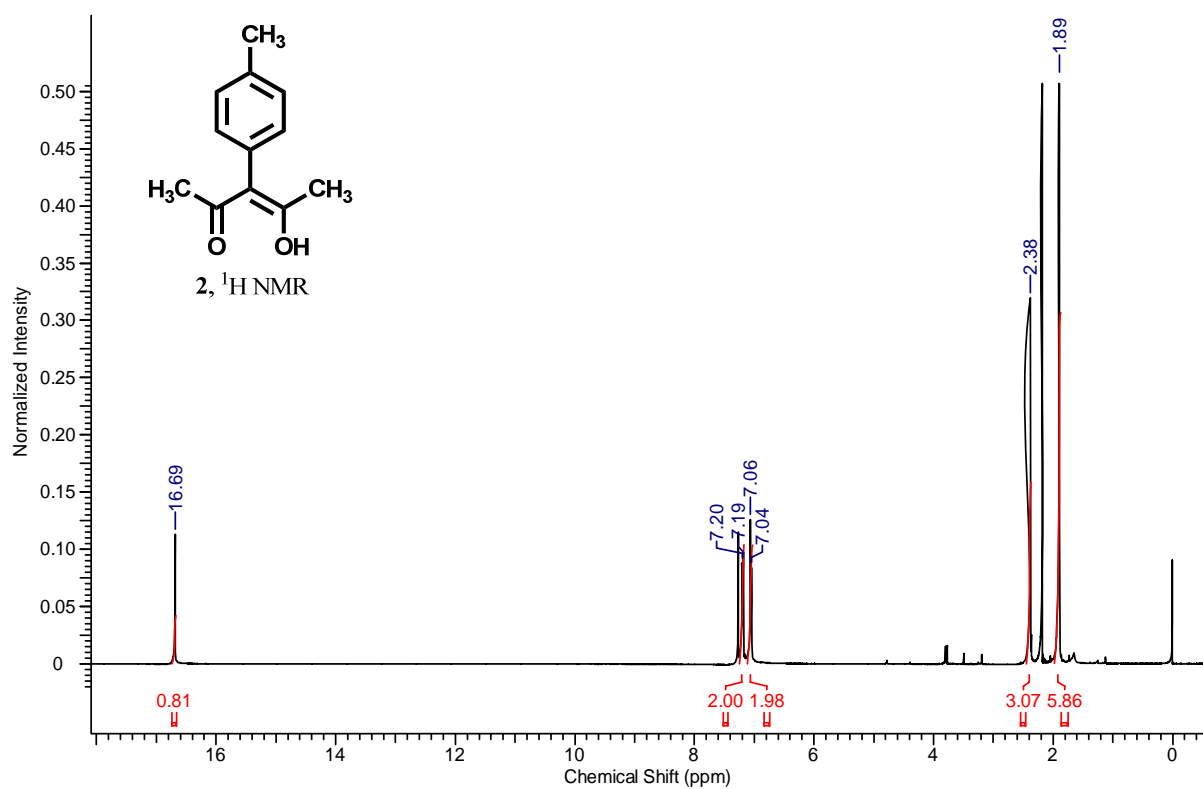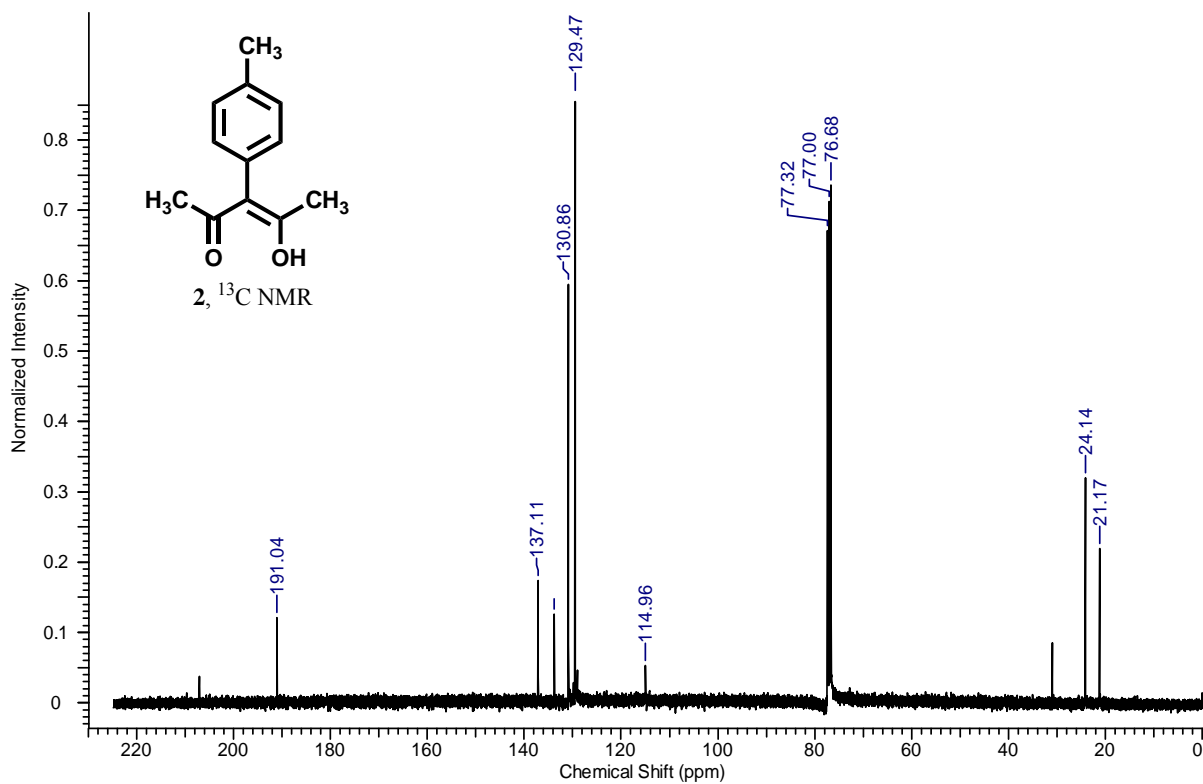

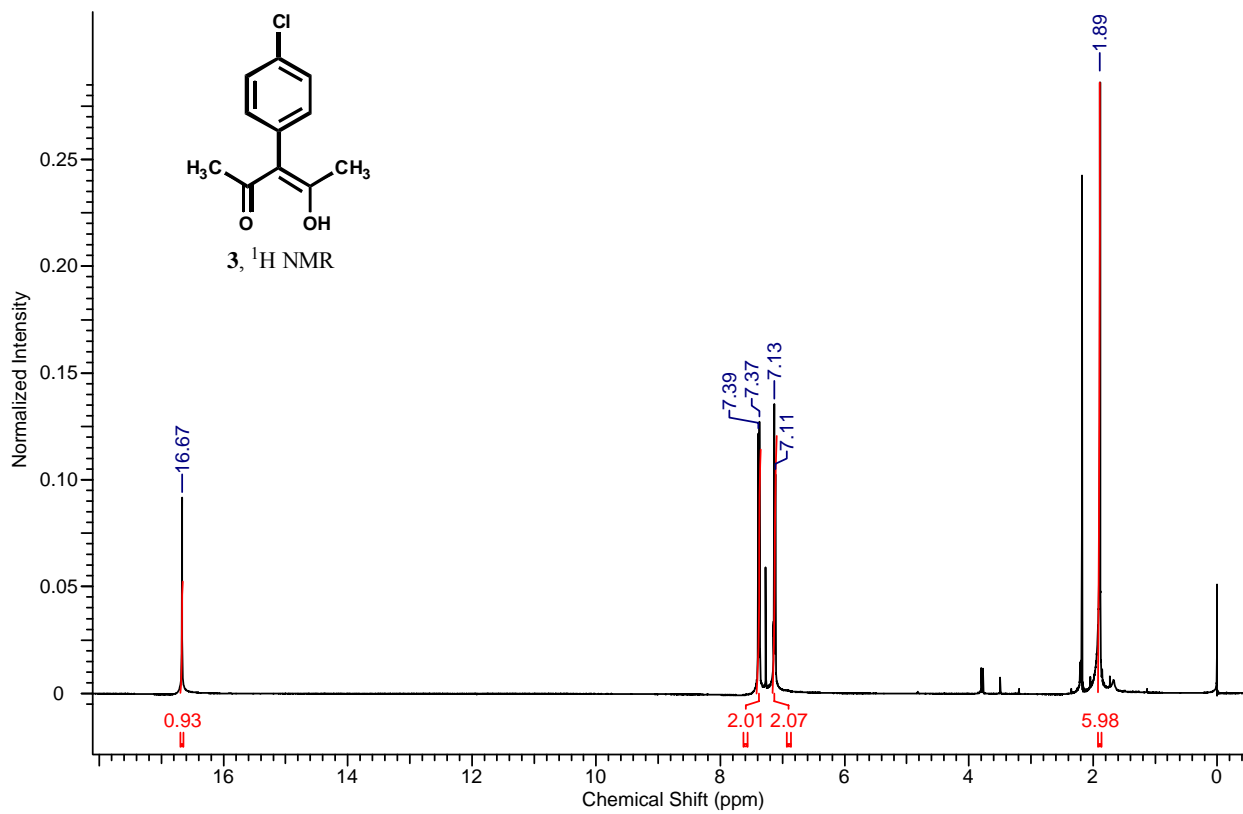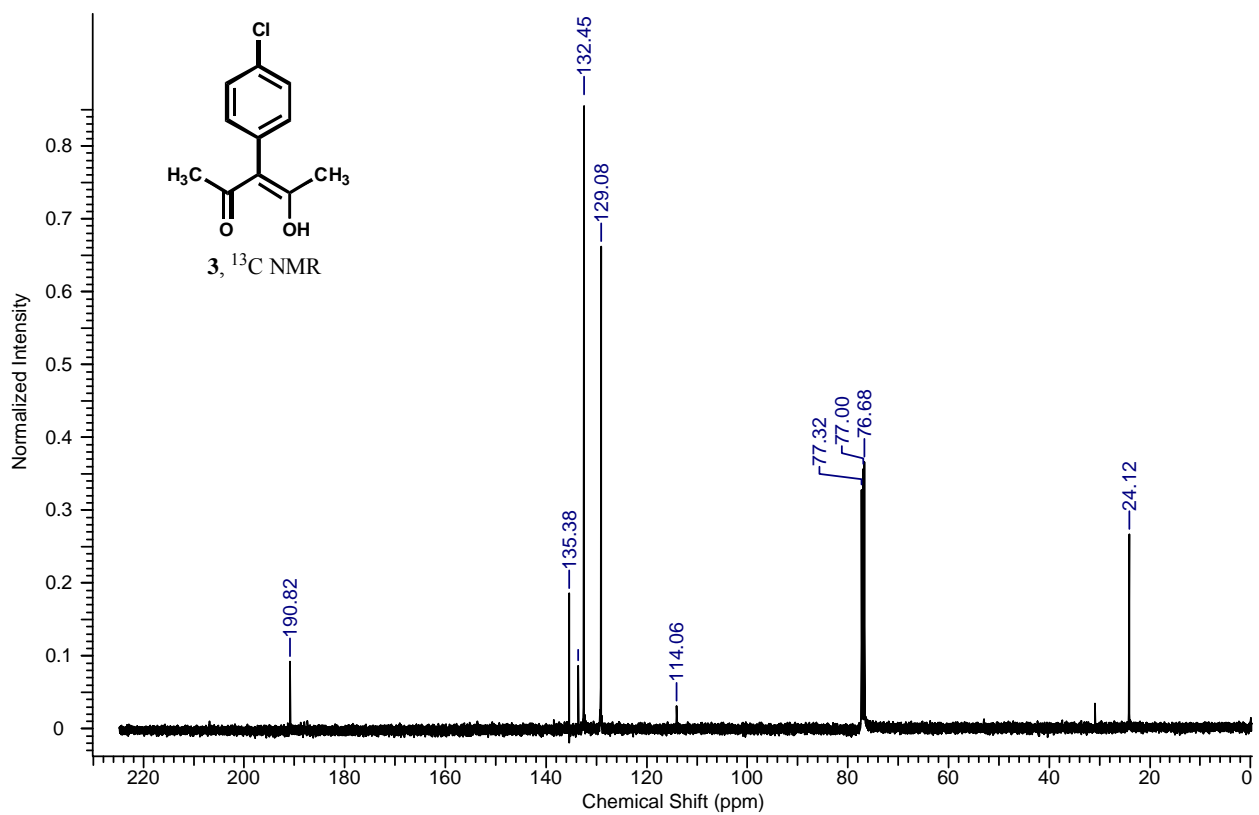

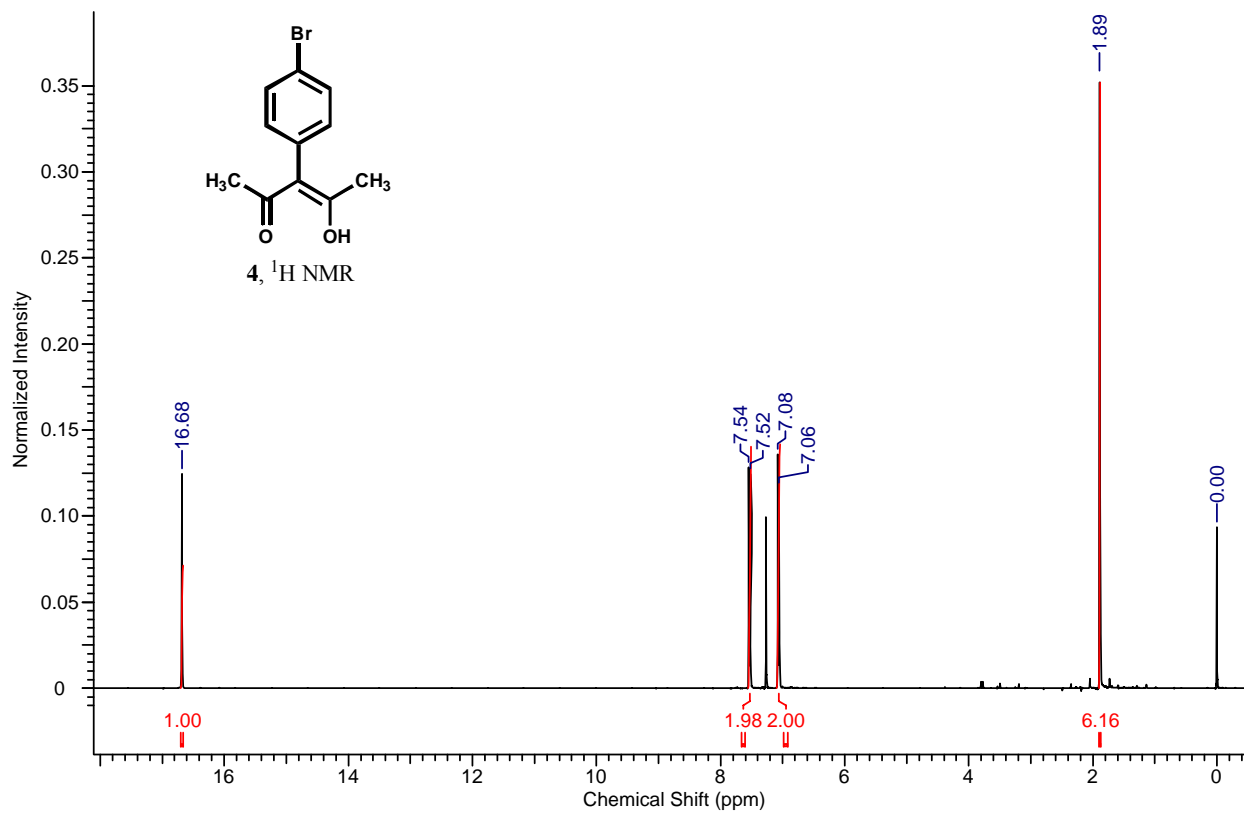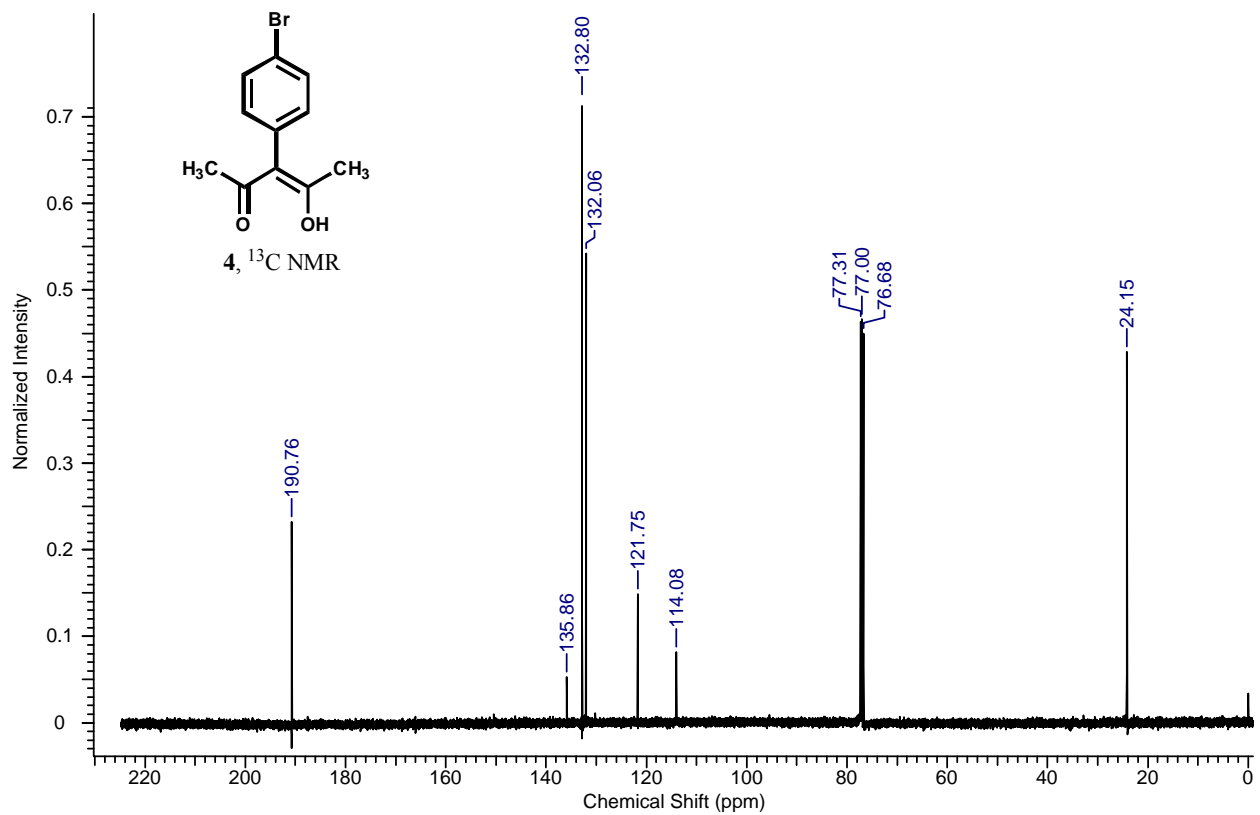

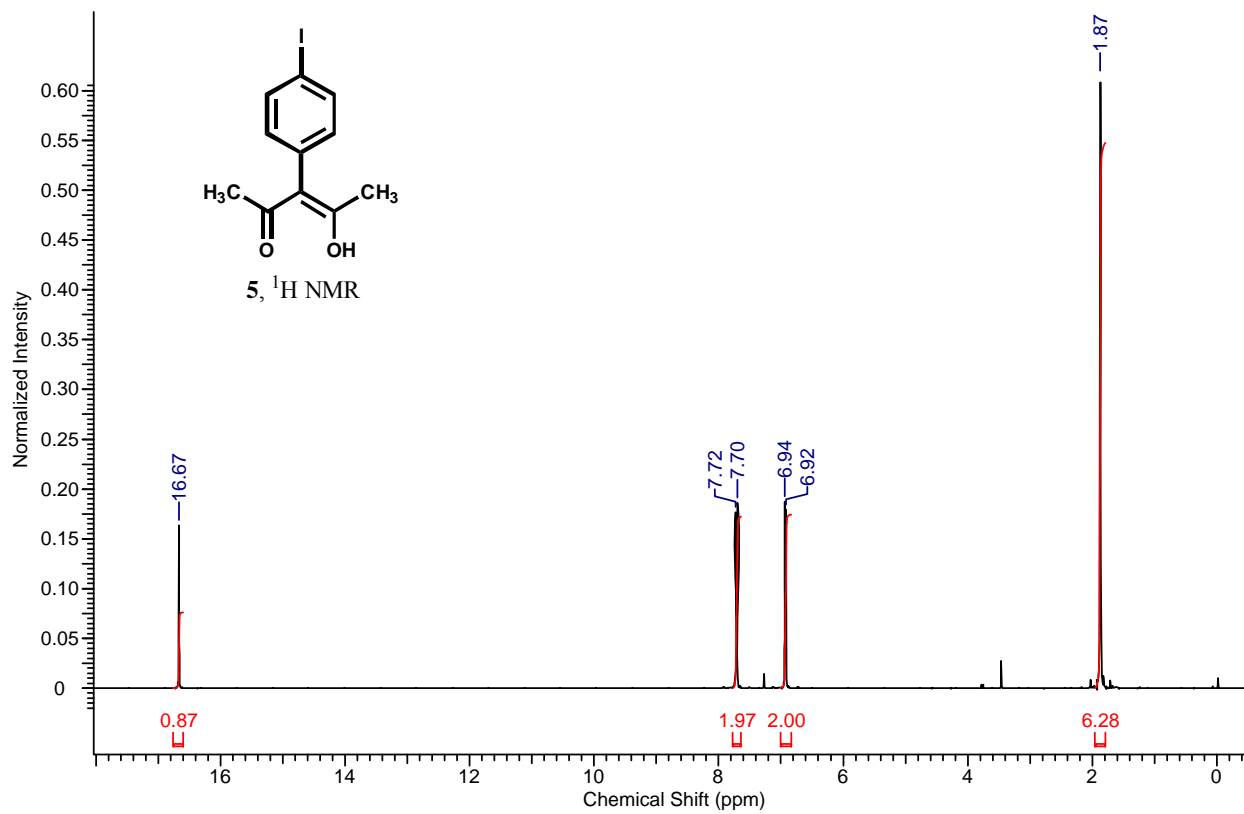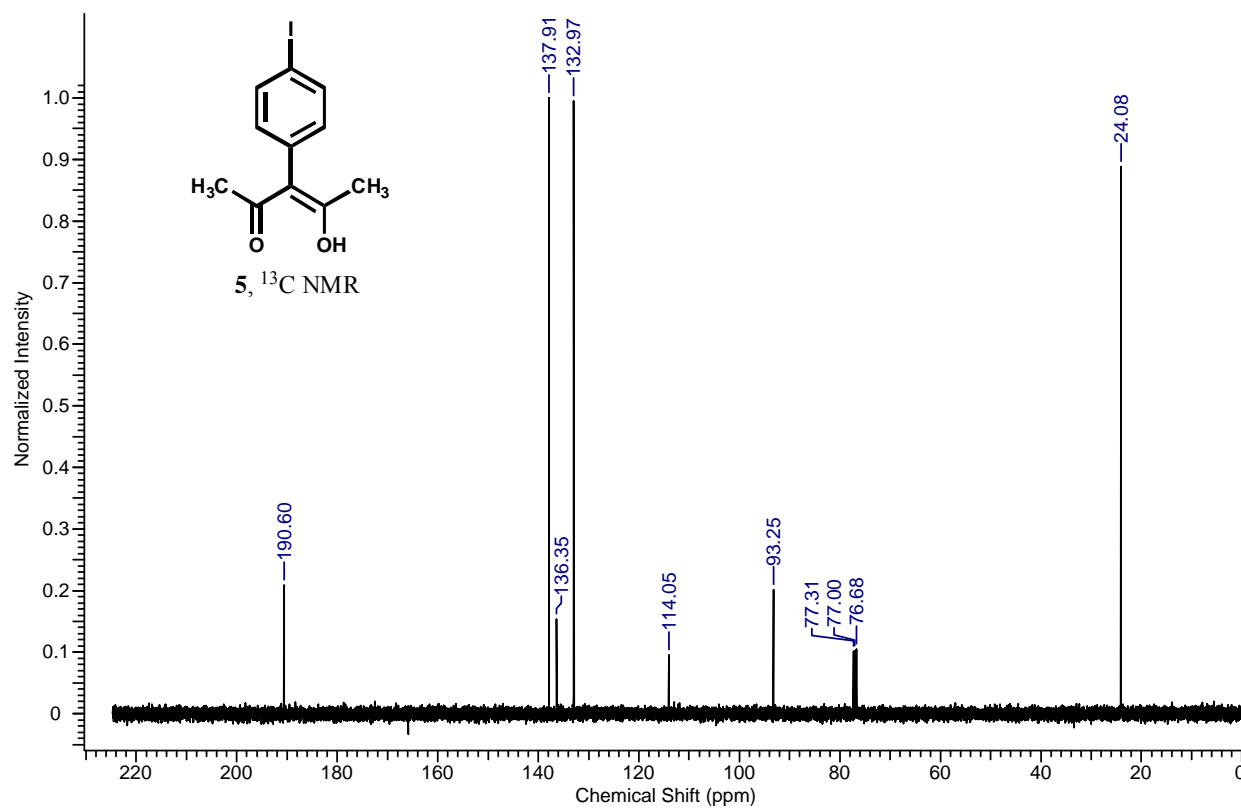

Supplement: c1dt10911a.pdf [file c1dt10911a.pdf]
